# Supplementary material
Source: PubMed Central journal article supplement (PMC3271593)
Supplement: cr2011129x1.pdf [file cr2011129x1.pdf]

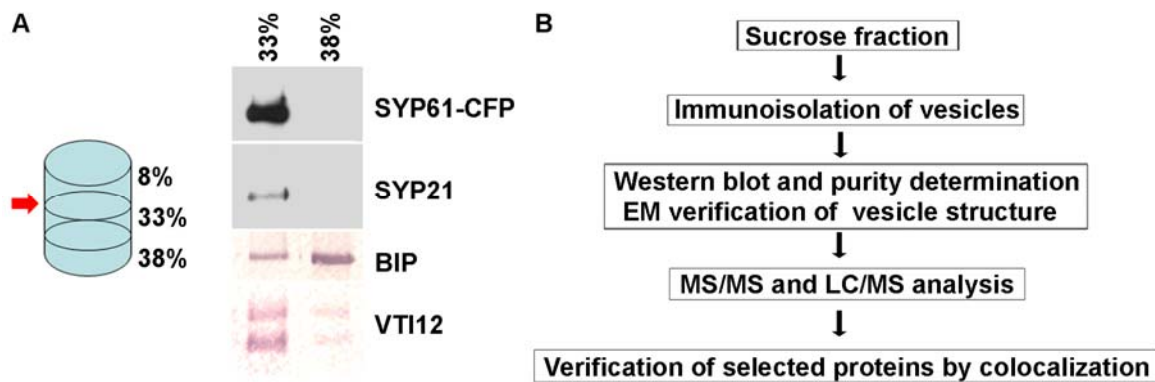

**Supplementary information, Figure S1** Fractionation of SYP61 vesicles.

**(A)** Sucrose gradient. Immunoblot analysis of fractions at 33%-8% sucrose and 38%-33% sucrose interfaces using antisera against GFP for (SYP61-CFP), SYP21 for (prevacuolar compartment) PVC, BiP for Endoplasmic Reticulum and VTI12 for Trans Golgi Network (TGN).

**(B)** Schematic representation of the immunopurification procedure.
