# Supplementary material
Source: PubMed Central journal article supplement (PMC3271593)
Supplement: cr2011129x2.pdf [file cr2011129x2.pdf]

**Supplementary information, Figure S2** LC/MS quantitative analysis using MS spectra intensity derived from extracted ion chromatograms (XIC).

For proteins that were detected both in SYP61 immunisolated vesicles and in IgG controls, an XIC-based AMRT label-free quantitation method was employed to compare the corresponding peptide ions abundance between the SYP61 sample and IgG control for all three biological replicates. A representative overlaid MS spectra intensity derived from XIC for each peptide/protein was manually generated using the MassLynx program to show relative quantitative difference between SYP61 sample and IgG control (for details, see Supplementary information, Table S2). Proteins #1-7 are enriched in SYP61 fraction. Two Rab GTPases (AT5G47200.1, AT4G17530.1) matched to the same peptides and a representative peptide NATNVEEAFMAMTAAIK was analyzed. Proteins #8, #9 represent examples of abundant background proteins.

1 AT1G28490.1  
CFP-SYP61

IIDELDTEMDSTK

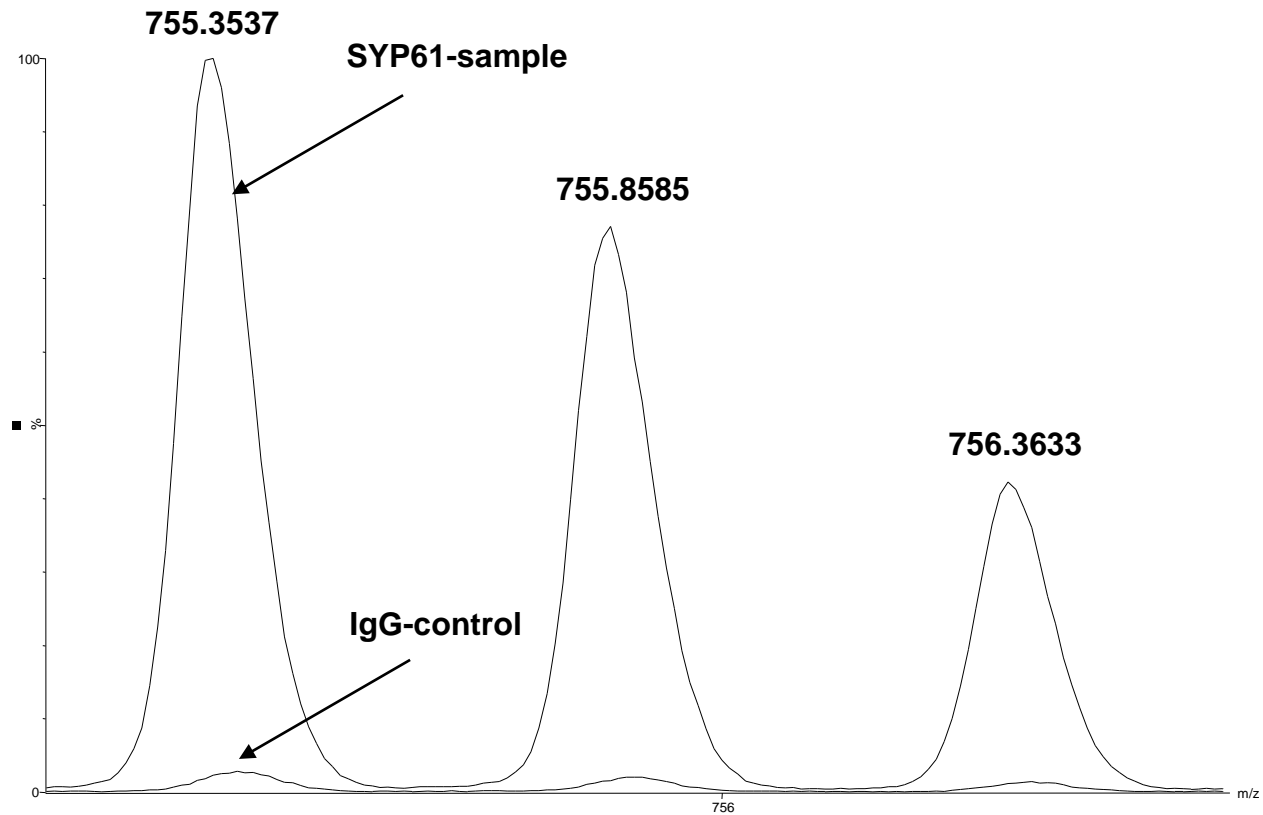

Peptides enriched in SYP61 compartment

2 AT1G78900.1  
VHA-A | vacuolar ATP synthase subunit A, F3,  
EDDLNEIVQLVGK, RT 42.3

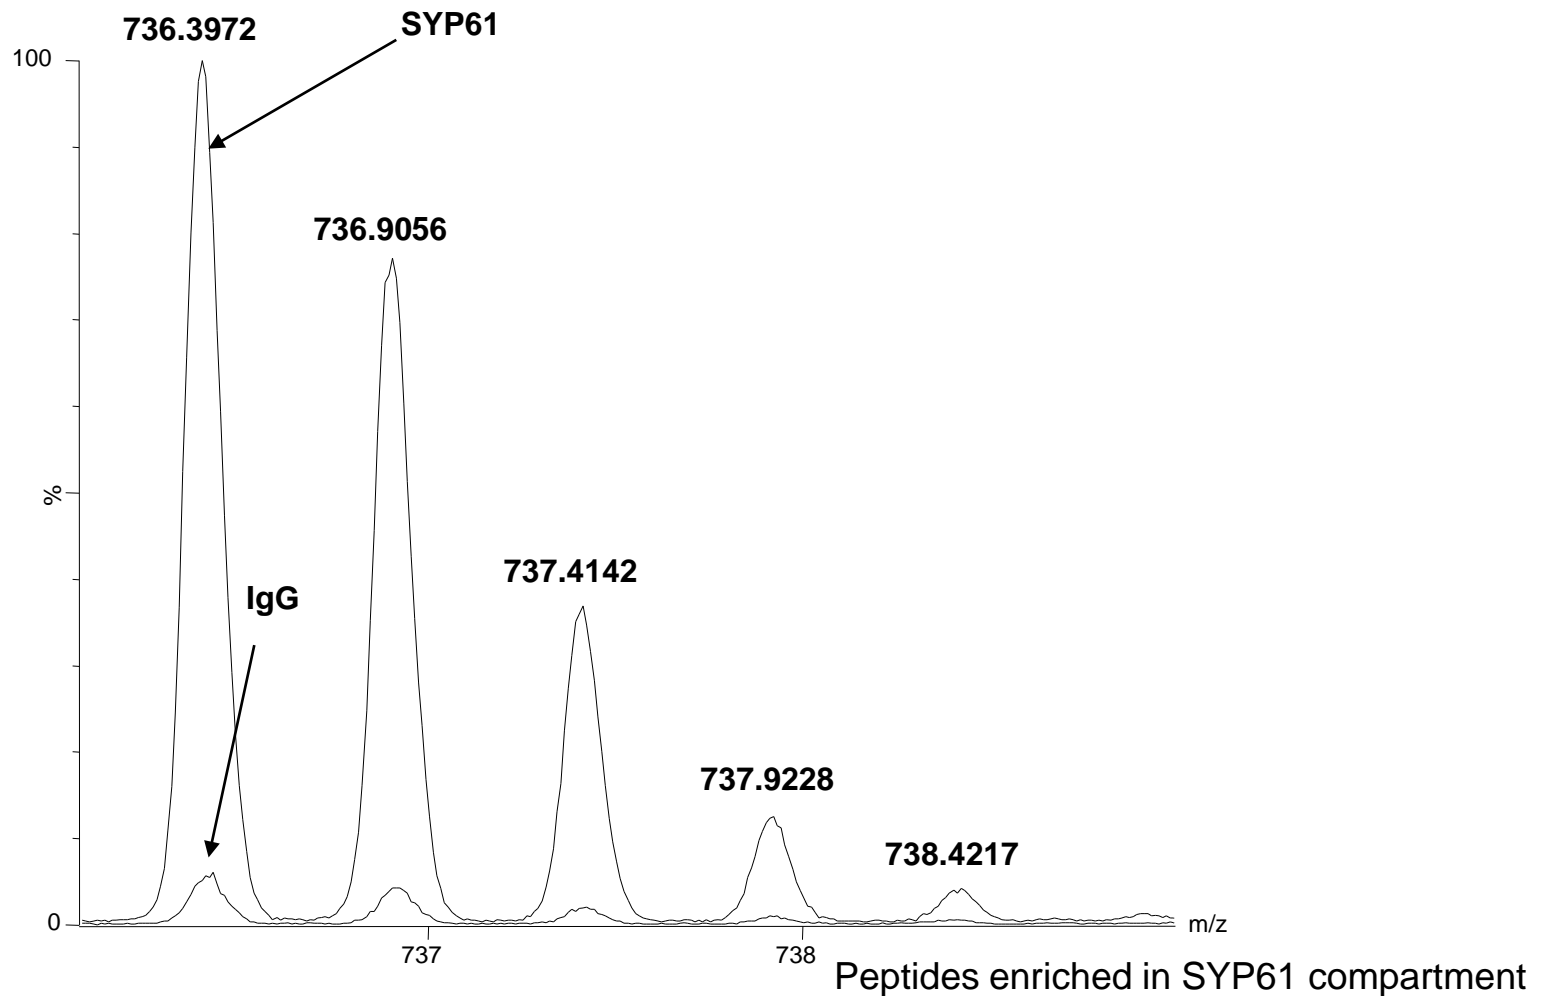

3 AT4G04910.1  
NSF | AAA-type ATPase family protein

R.DLFADAEQDQR.T

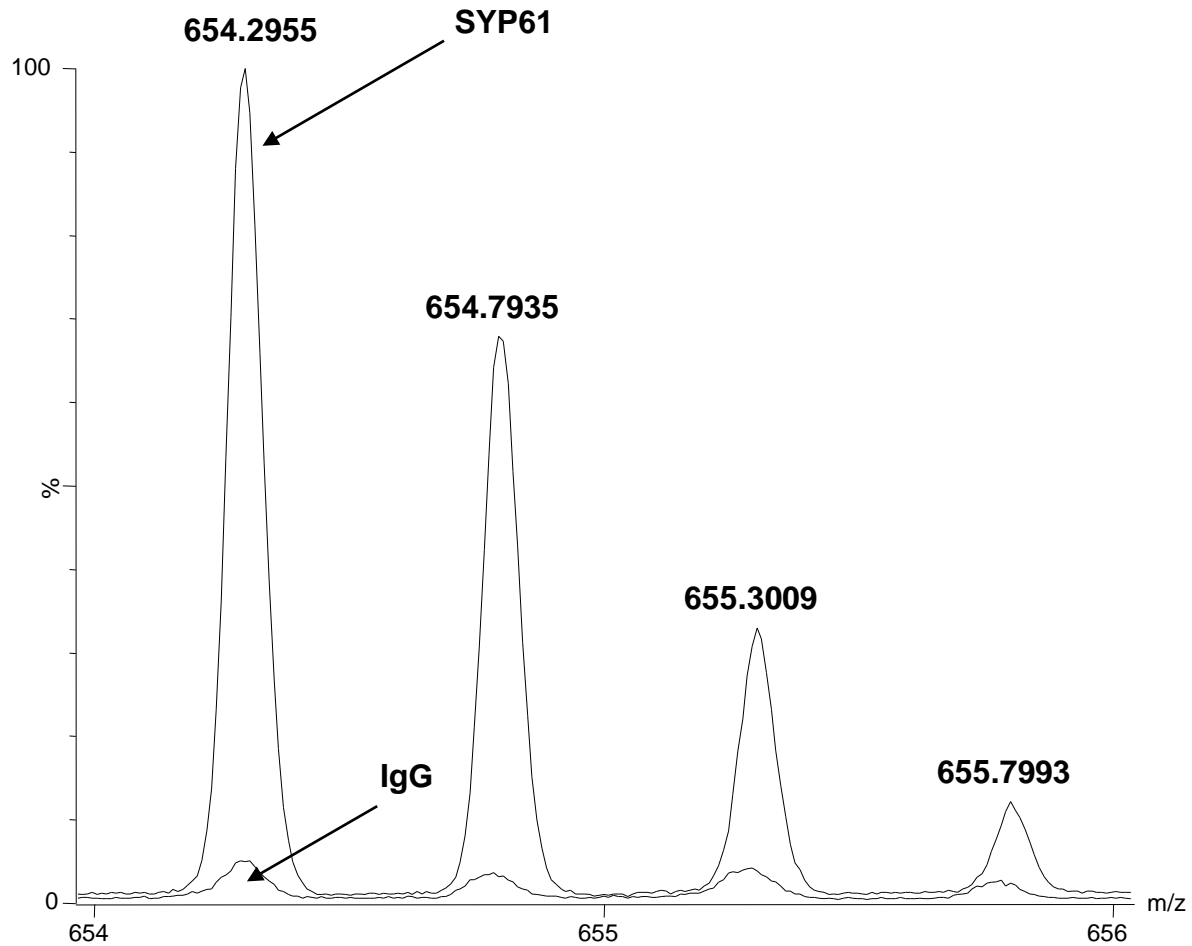

Peptides enriched in SYP61 compartment

4 AT5G47200.1/AT4G17530.1  
ATRAB1A/ATRAB1C

NATNVEEAFMAMTAAIK

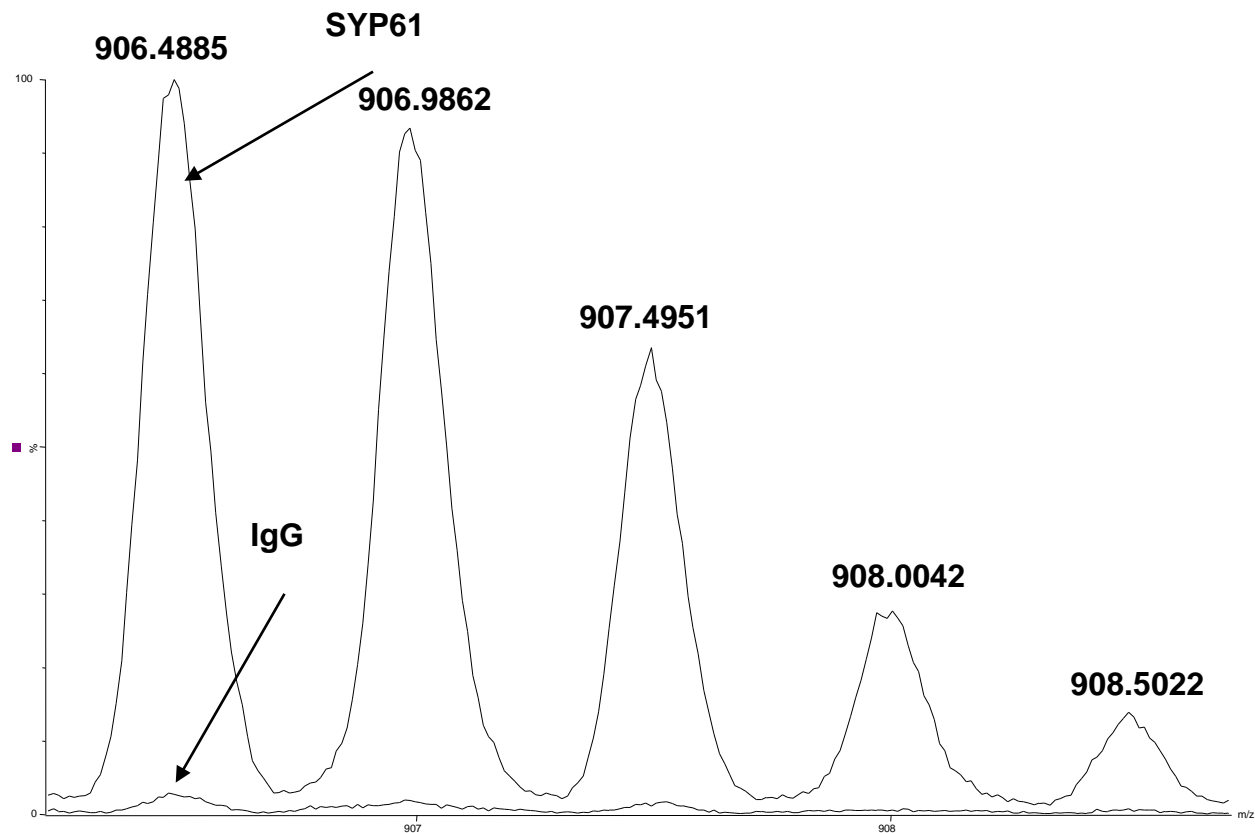

Peptides enriched in SYP61 compartment

5 AT1G09330.1  
Unknown function/Echidna

QFQQFASQTIASR

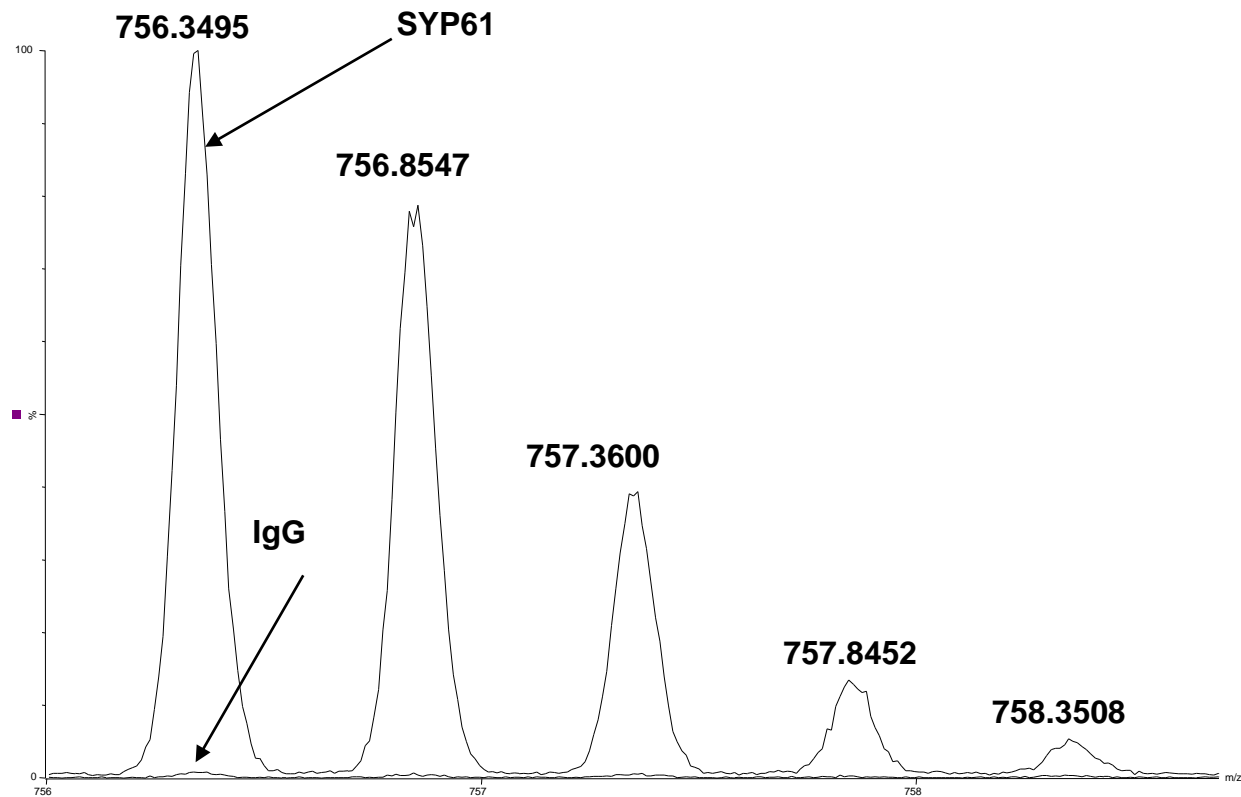

Peptides enriched in SYP61 compartment

6 AT2G14740/AT2G14720  
VSR4, VSR2;1, BP80-2;1, MTV4  
VSR3, VSR2;2, BP80-2;2

AGASAVLVADNVDEPLITMDTPEEDVSSAK

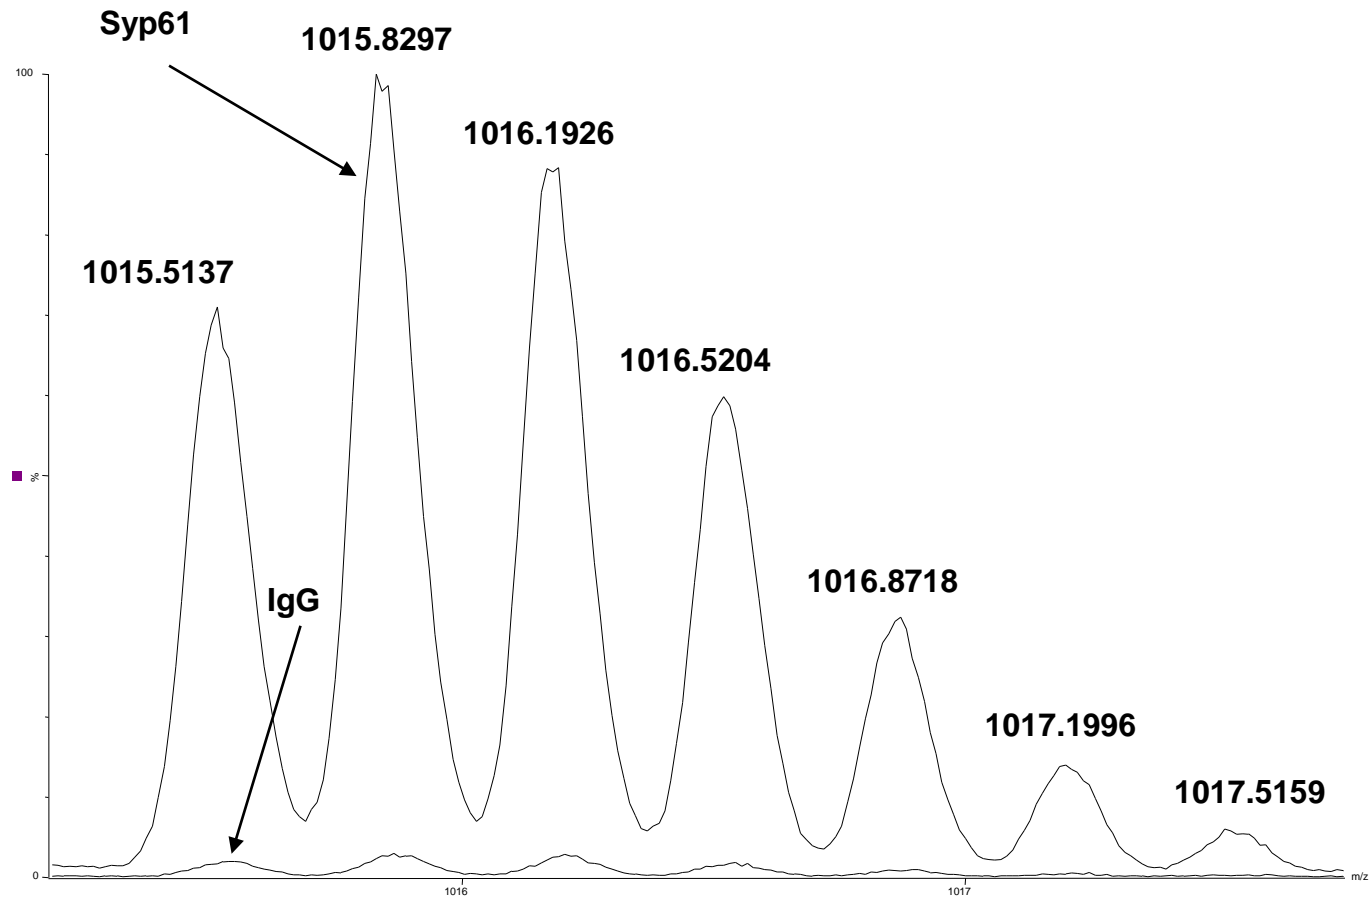

Peptides enriched in SYP61 compartment

7 AT5G27770.1  
Ribosomal L22e protein family

IMEIASLEK

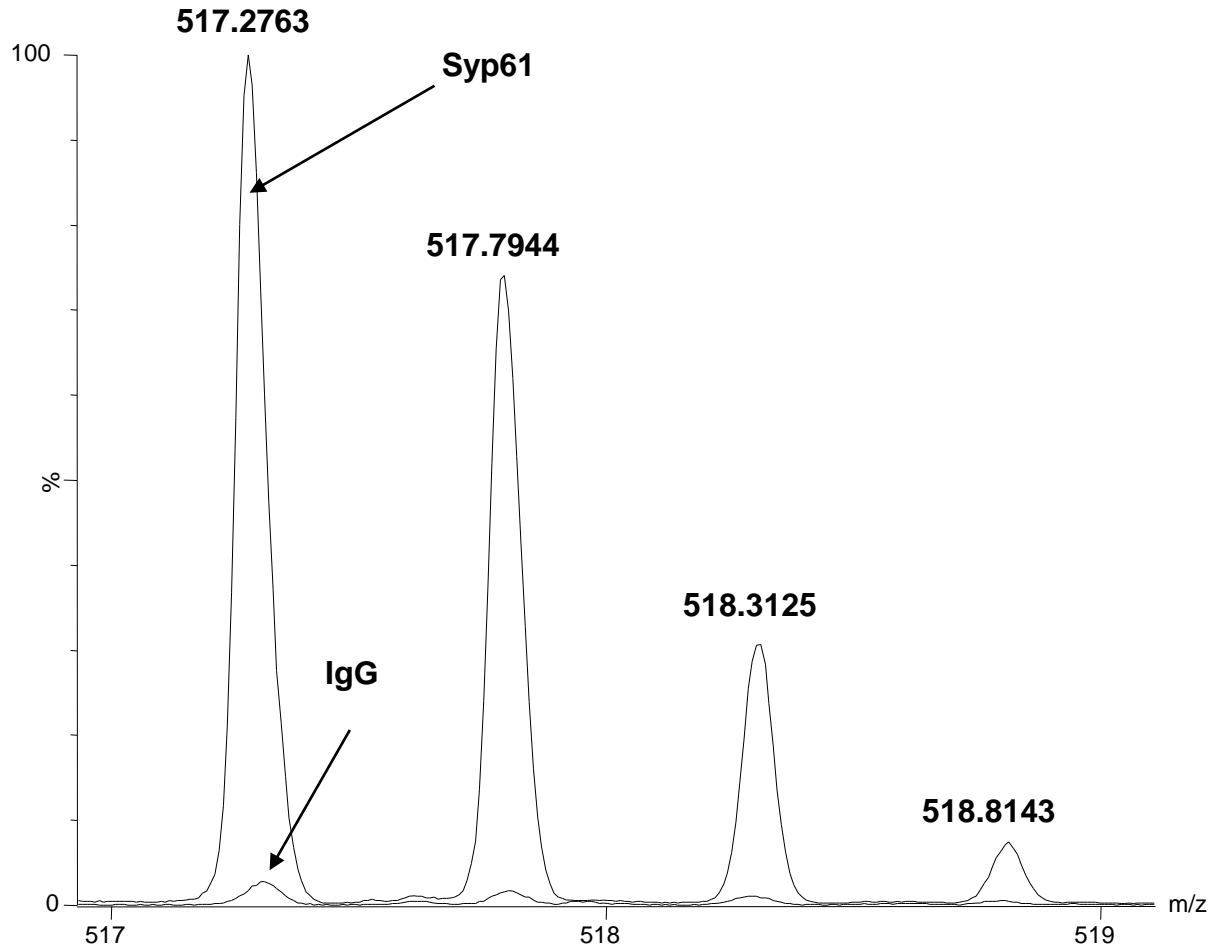

Peptides enriched in SYP61 compartment



AT3G11930.1

8 Adenine nucleotide alpha hydrolases-like superfamily protein

AEEQAATAMETSAVEKQPETTTEAEAPSLTTK, +42.01 (N-term)

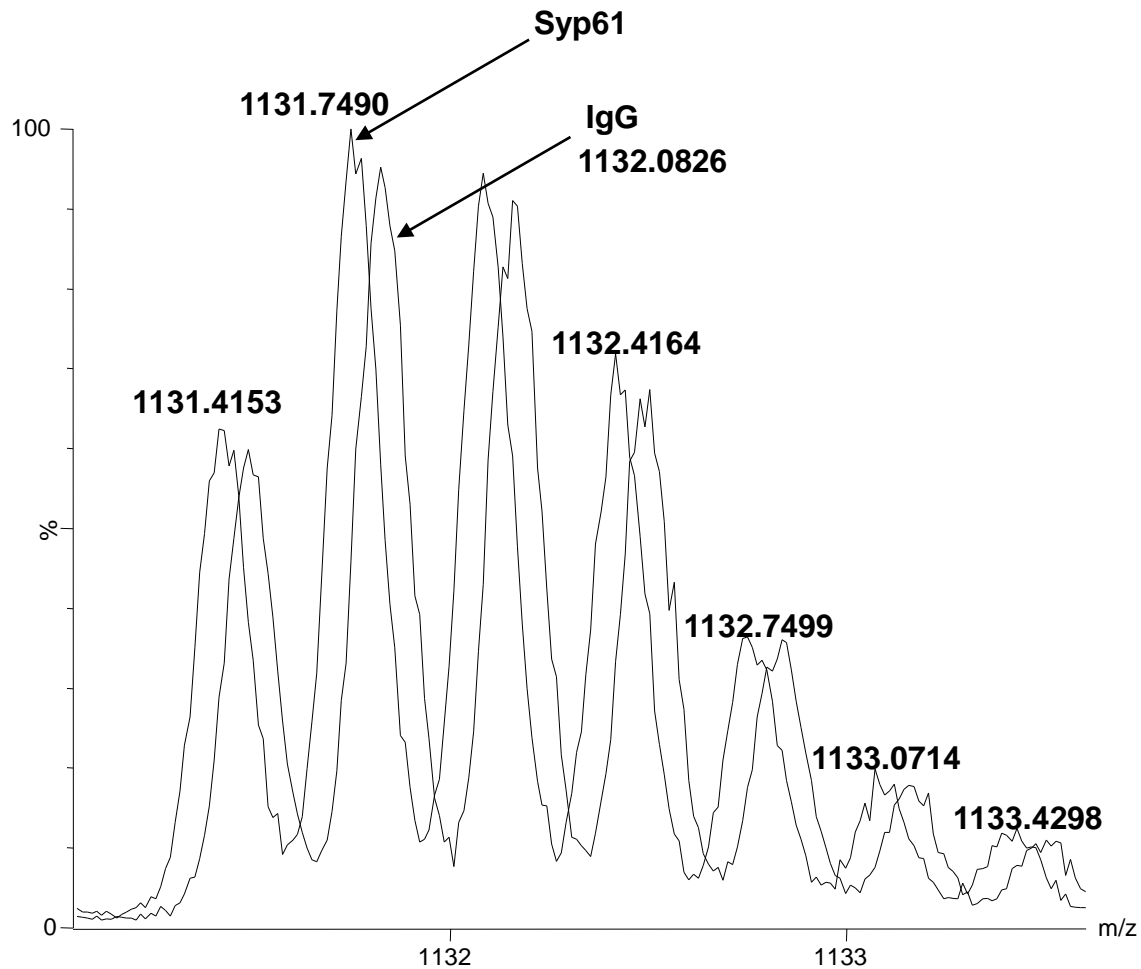

Example of abundant background proteins

AT5G60390.1

9 GTP binding Elongation factor Tu family protein

IGGIGTVPVGR

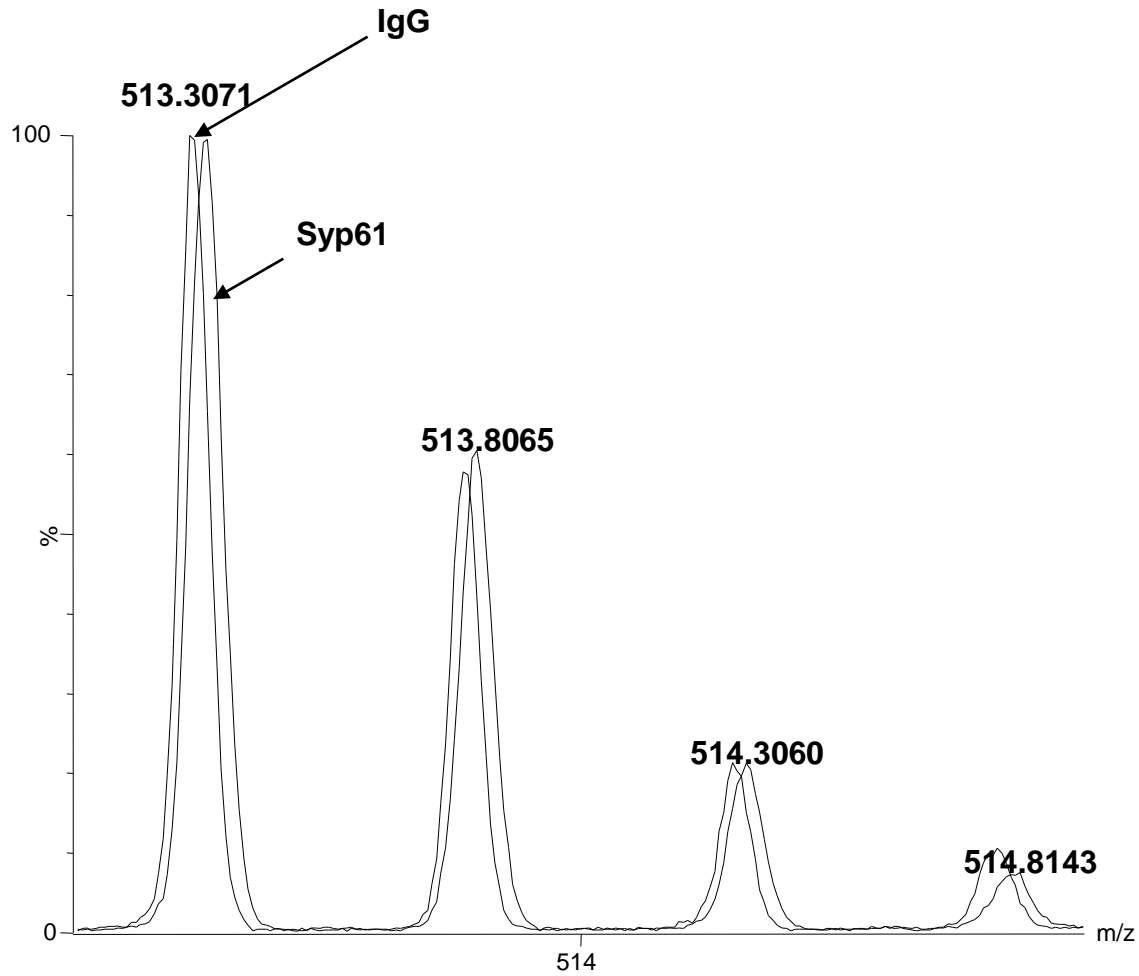

Example of abundant background proteins
