# Supplementary material
Source: PubMed Central journal article supplement (PMC3271593)
Supplement: cr2011129x3.pdf [file cr2011129x3.pdf]

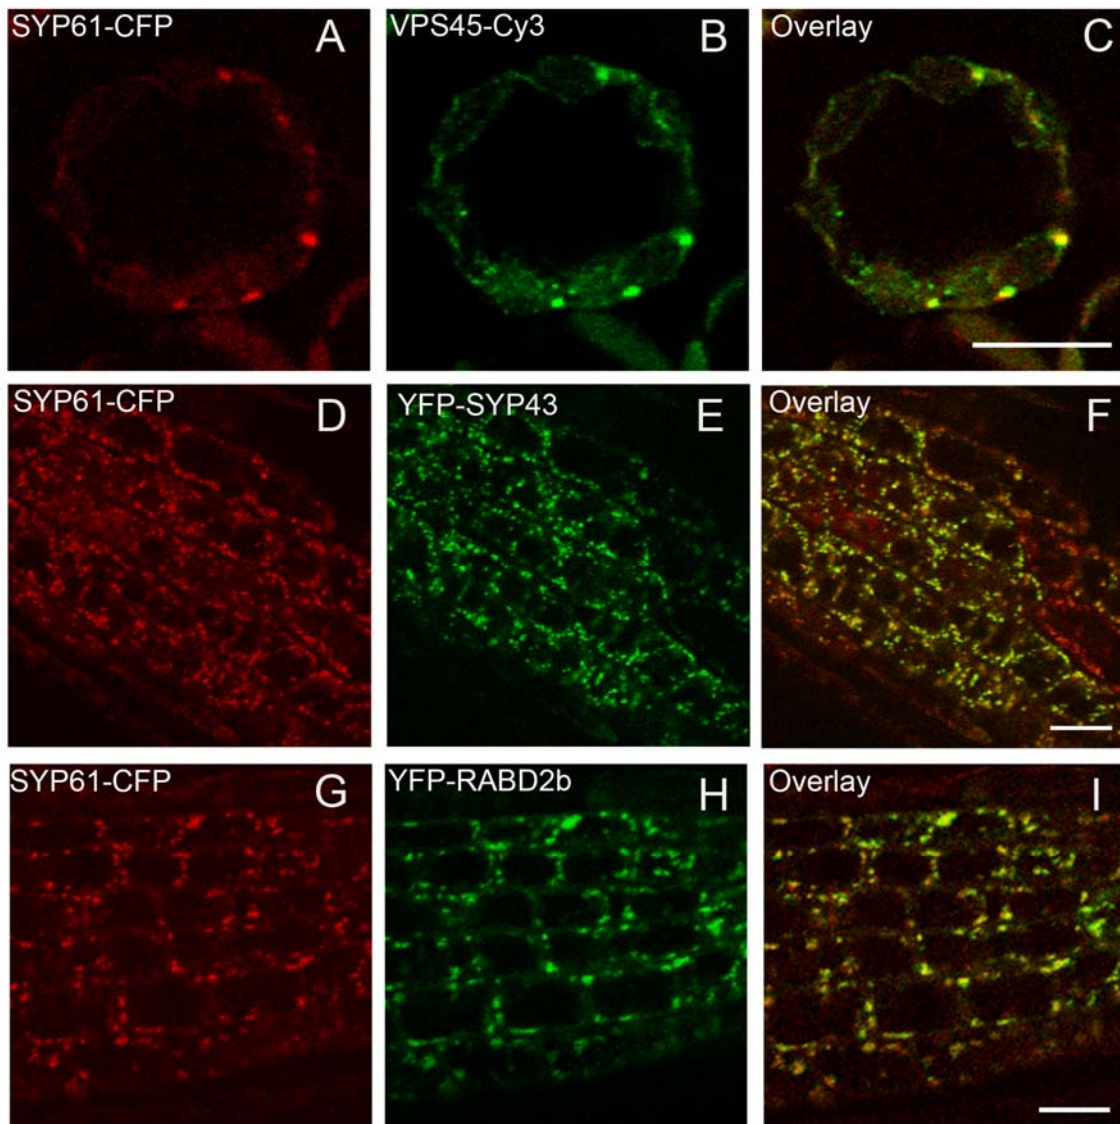

**Supplementary information, Figure S3** SYP61 colocalizes with isolated components of SNARE complexes VPS45, SYP43, and the GTPase RABD2B.

Confocal images of SYP61::SYP61-CFP (red) and VPS45-Cy3 (**A-C**), 35S::YFP-SYP43 (**D-F**), and UBQ::YFP-RABD2b (**G-I**) (green) in expressing root cells. Overlay images are showing colocalization. Scale bar = 10  $\mu$ m.
