# Supplementary material
Source: PubMed Central journal article supplement (PMC3271593)
Supplement: cr2011129x4.pdf [file cr2011129x4.pdf]

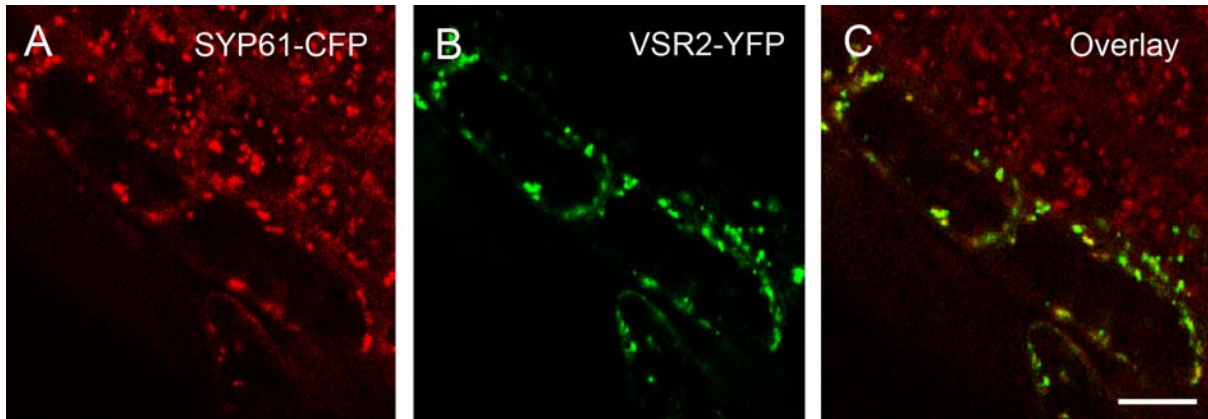

**Supplementary information, Figure S4 SYP61 colocalization with VSR2.**

(A and B) Confocal images of SYP61::SYP61-CFP (red) and 35S::VSR2-YFP (green) in root cells. (C) Overlay images are showing partial colocalization of SYP61 with VSR2. Scale bar = 10  $\mu\text{m}$ .
