# Supplementary material
Source: PubMed Central journal article supplement (PMC3271593)
Supplement: cr2011129x5.pdf [file cr2011129x5.pdf]

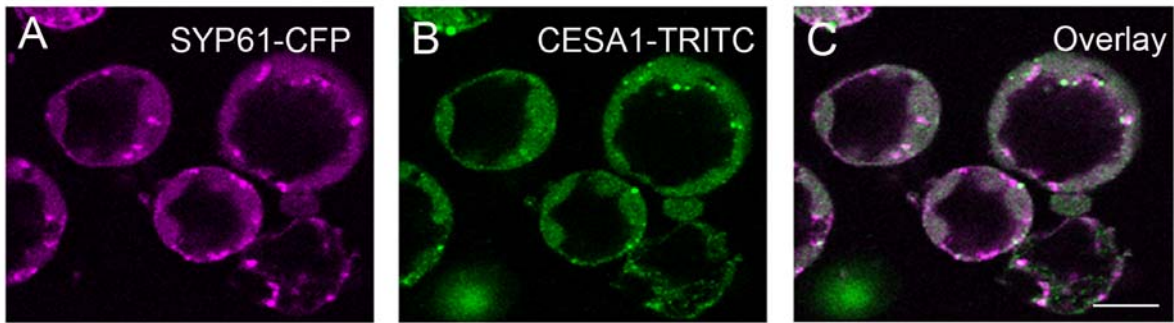

**Supplementary information, Figure S5** Colocalization of SYP61 with CESA1 in *Arabidopsis* protoplasts.

(A) SYP61::SYP61-CFP (purple), (B) CESA1-TRITC (green). (C) Overlay demonstrates colocalization of the two proteins in white. Scale bar = 10  $\mu$ m.
