# Supplementary material
Source: PubMed Central journal article supplement (PMC3271593)
Supplement: cr2011129x6.pdf [file cr2011129x6.pdf]

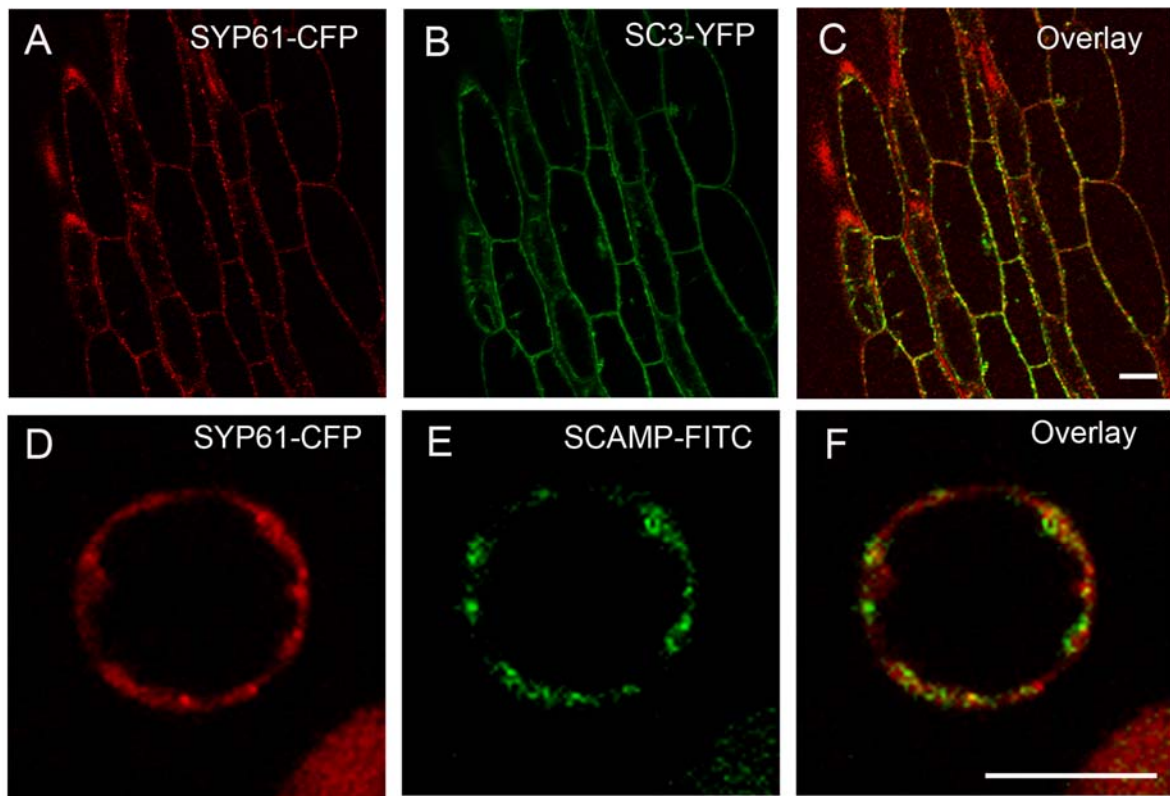

**Supplementary information, Figure S6** Colocalization of SYP61 with SCAMP.

(A-C) Colocalization of SYP61::SYP61-CFP (red) with 35S::SCAPM1-YFP (green) in *Arabidopsis* hypocotyls cells. Antibody based colocalization using antibodies against SCAMP (immunocytochemistry) was used to verify the colocalization. Colocalization of (D-F) SYP61::SYP61-CFP with SCAPM1-FITC in *Arabidopsis* protoplasts. Scale bar = 10  $\mu$ m.
