# Supplementary material
Source: PubMed Central journal article supplement (PMC3271593)
Supplement: cr2011129x9.pdf [file cr2011129x9.pdf]

**Supplementary information, Table S3** Primers used for cDNA amplifications

| <b>Protein</b>                        | <b>PCR</b>                    |                                |
|---------------------------------------|-------------------------------|--------------------------------|
|                                       | <b>Forward Primer</b>         | <b>Reverse primer</b>          |
| Integral membrane Yip1 family protein | CACCATGATGTCCGGCGGGA ACTACAC  | TCATACTTTGACATTGAAGATATAG      |
| VSR2                                  | CACCATGAGGACGACGAATGTATGGTT   | CAACTCTAGTTGAGAAGAAAGTTGAGTAAT |
| VSR4                                  | CACCATGAAGCAGCTTCTATGTTATCTTC | GGCACGTTTCATCATTCG             |
| SC3 (SECRETORY CARRIER 3)             | CACCATGGCTAATCGTTATGATCCAAATC | TCAAACAGCGGCTCTCAAG            |
| NSF                                   | CACCATGGCGGGTCGTTACGGATC      | CTAGCCAGTGAAGCGAATGAAGT        |
| At1g09330 (ECHIDNA)                   | CACCATGGACCCTAATAATCAGATACAGG | GACAAGGGTGAAGGCAGATT           |
| At2g45010                             | CACCATGGCGGATGGAAACG          | CTATAGAGGGACCATCTCGAGATC       |
